# Supplementary material for: The α-Synuclein Monomer May Have Different Misfolding Mechanisms in the Induction of α-Synuclein Fibrils with Different Polymorphs
Source: MDPI journal article supplement (doi:10.3390/biom13040682), 2023-04-17
Supplement: s1 [file s1]

**Supporting Information:**

**The  $\alpha$ -Synuclein Monomer May Have Different Misfolding Mechanisms in the Induction of  $\alpha$ -Synuclein Fibrils with Different Polymorphs**

**Nannan Zhao <sup>1,†</sup>, Qianqian Zhang <sup>2,†</sup>, Fansen Yu <sup>1</sup>, Xiaojun Yao <sup>3</sup> and Huanxiang Liu <sup>1,2,\*</sup>**

<sup>1</sup> School of Pharmacy, Lanzhou University, Lanzhou 730000, China

<sup>2</sup> Faculty of Applied Sciences, Macao Polytechnic University, Macao SAR, China

<sup>3</sup> College of Chemistry and Chemical Engineering, Lanzhou University, Lanzhou 730000, China

\* Correspondence: hxliu@mpu.edu.mo; Tel.: +853-8599-6874

† These authors contributed equally to this work.

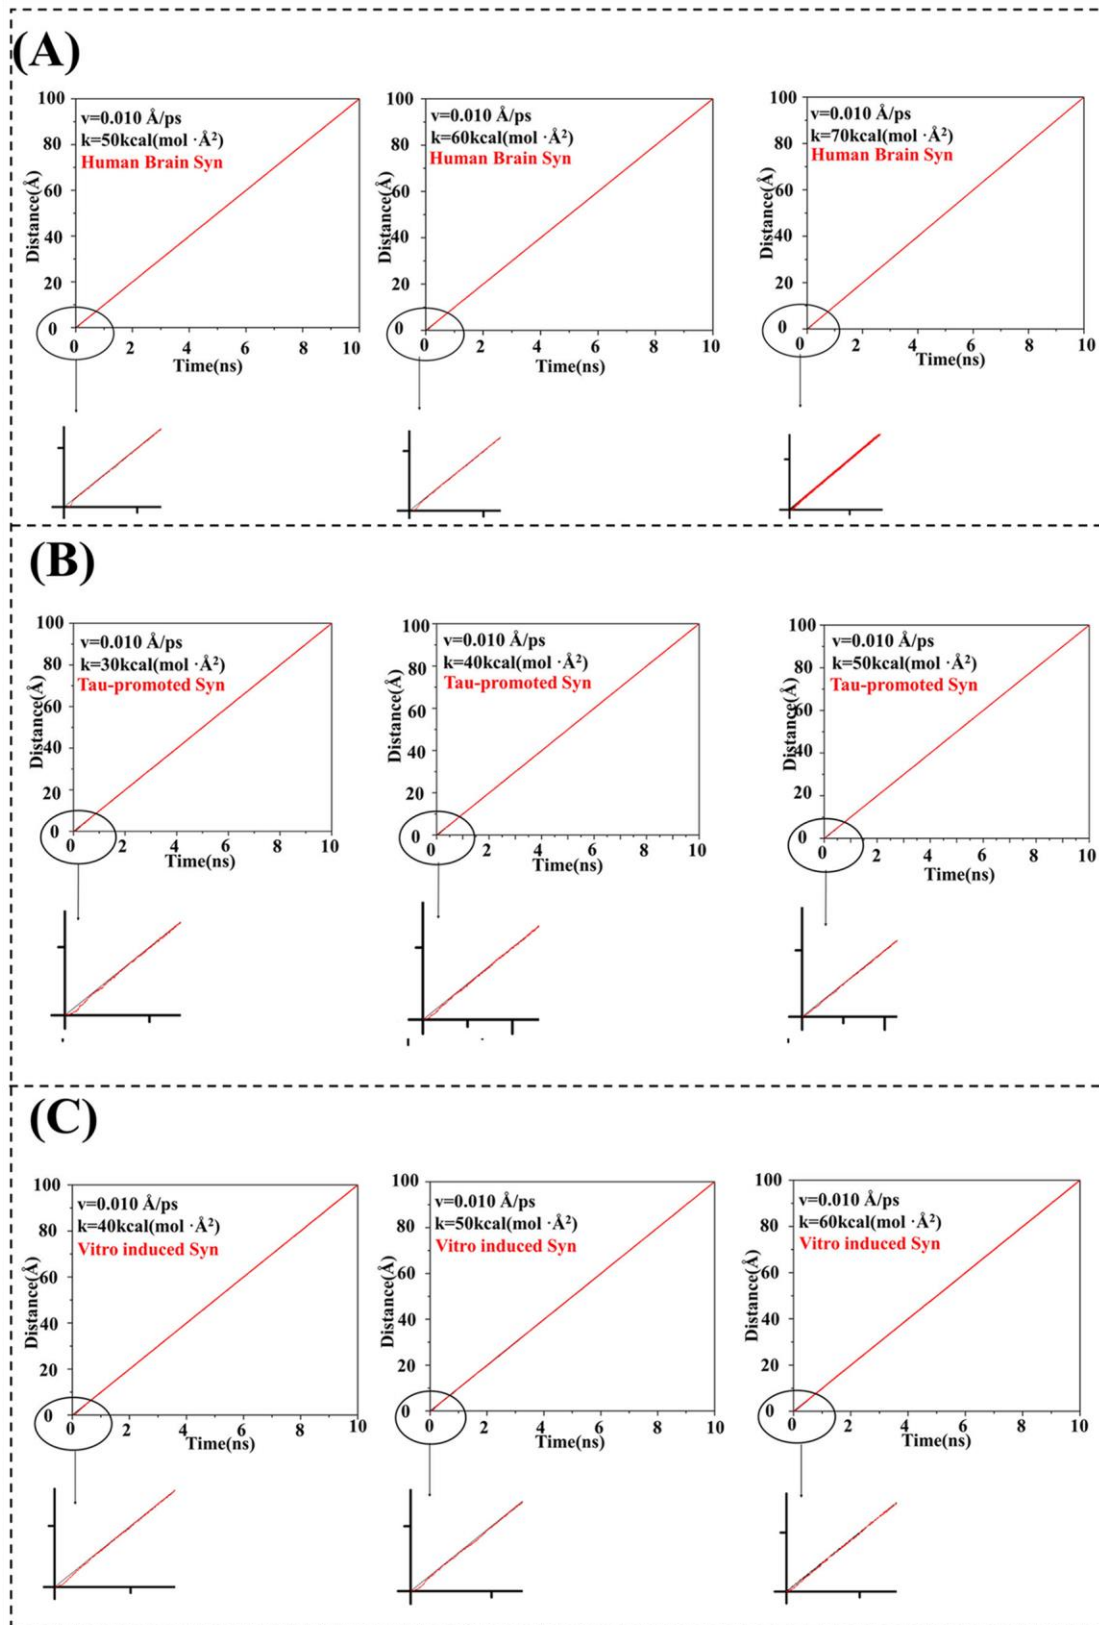

Figure S1. Parameter correction for SMD. (A) Diseased human brain model. (B) In vitro cofactor-tau induction model. (C) In vitro cofactor-free induction model.

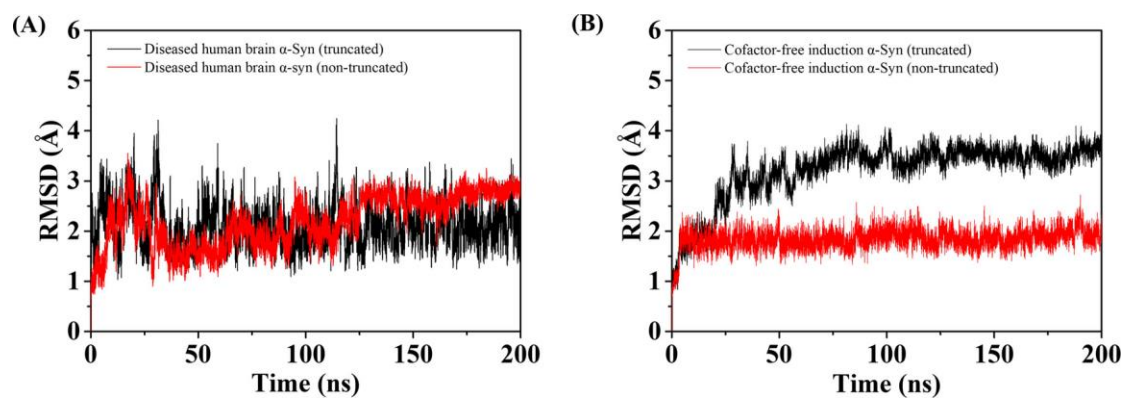

Figure S2. Convergence verification. (A) The backbone RMSDs of diseased human brain  $\alpha$ -Syn fibrils as a function of time in truncated structure (black) and non-truncated structure (red). (B) The backbone RMSDs of cofactor-free induction  $\alpha$ -Syn fibrils as a function of time in truncated structure (black) and non-truncated structure (red).

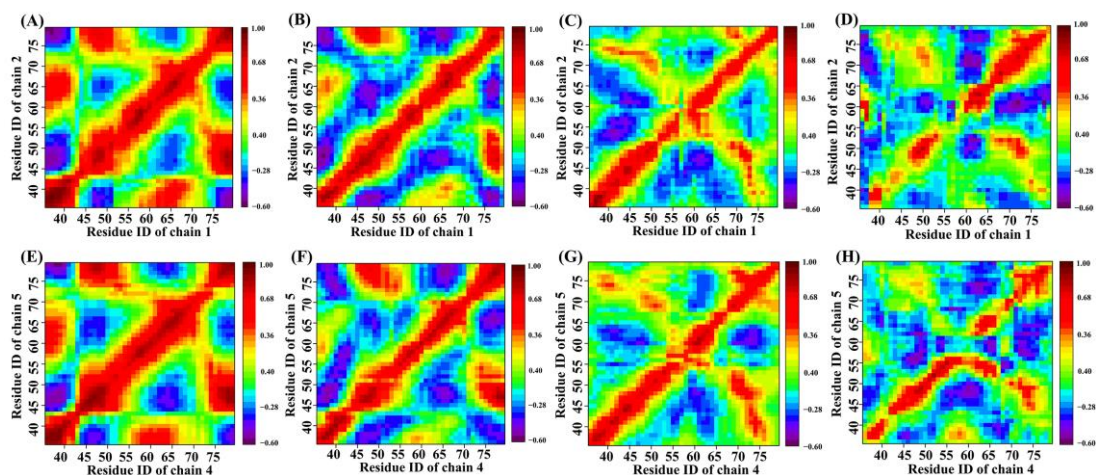

Figure S3. DCCM analysis from converged trajectories of the CMD simulation. (A,B) Chain-1/2 of non-truncated and truncated structures in human brain systems. (C,D) Chain-1/2 of non-truncated and truncated structures in cofactor-free system. (E,F) Chain-4/5 of non-truncated and truncated structures in human brain system. (G,H) Chain-4/5 of non-truncated and truncated structures in cofactor-free system. Red represents a strong interaction between residues, and blue depicts a weak interaction between residues.

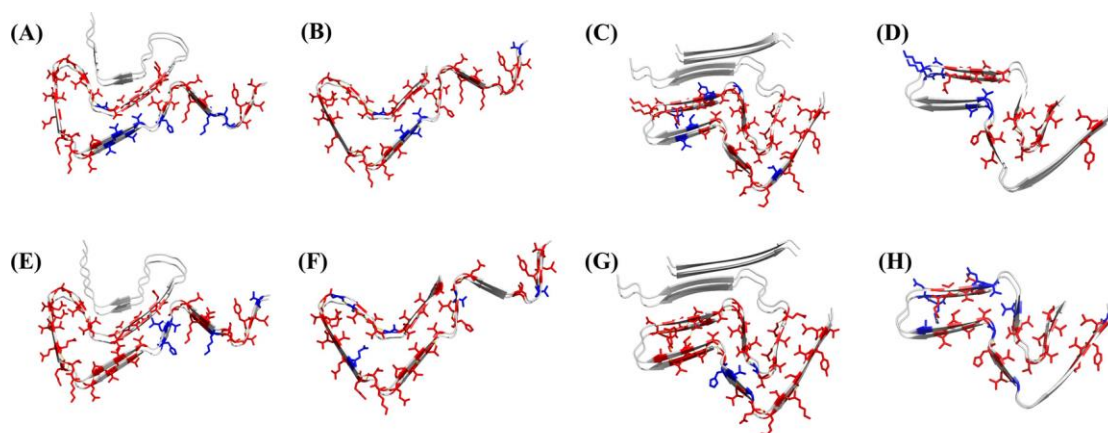

■ hydrogen bond occupancies of >90%
 ■ hydrogen bond occupancies of >80%

Figure S4. Backbone hydrogen bonds analysis from CMD simulation. (A,B) Chain-1/2 of non-truncated and truncated structures in human brain system. (C,D) Chain-1/2 of non-truncated and truncated structures in cofactor-free system. (E,F) Chain-4/5 of non-truncated and truncated structures in human brain system. (G,H) Chain-4/5 of non-truncated and truncated structures in the cofactor-free system. Red and blue represent the hydrogen bond occupancies of >90 and >80%, respectively.

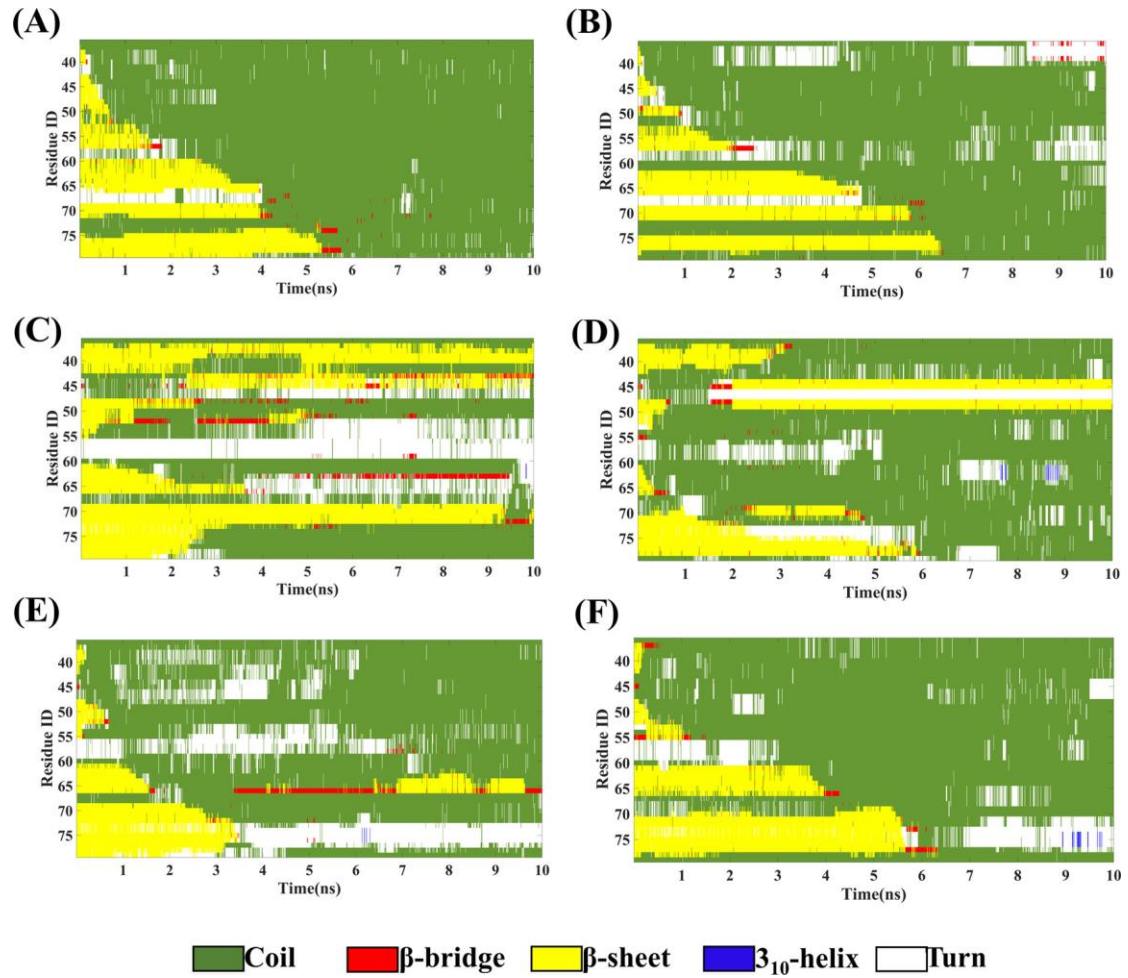

Figure S5. Changes in the secondary structure as a function of time. (A,B) Chain-1 of non-truncated structure and truncated in human brain system. (C,D) Chain-1 of non-truncated structure and truncated structures in cofactor-free system in path1. (E,F) Chain-1 of non-truncated structure and truncated structures in cofactor-free system in path2.



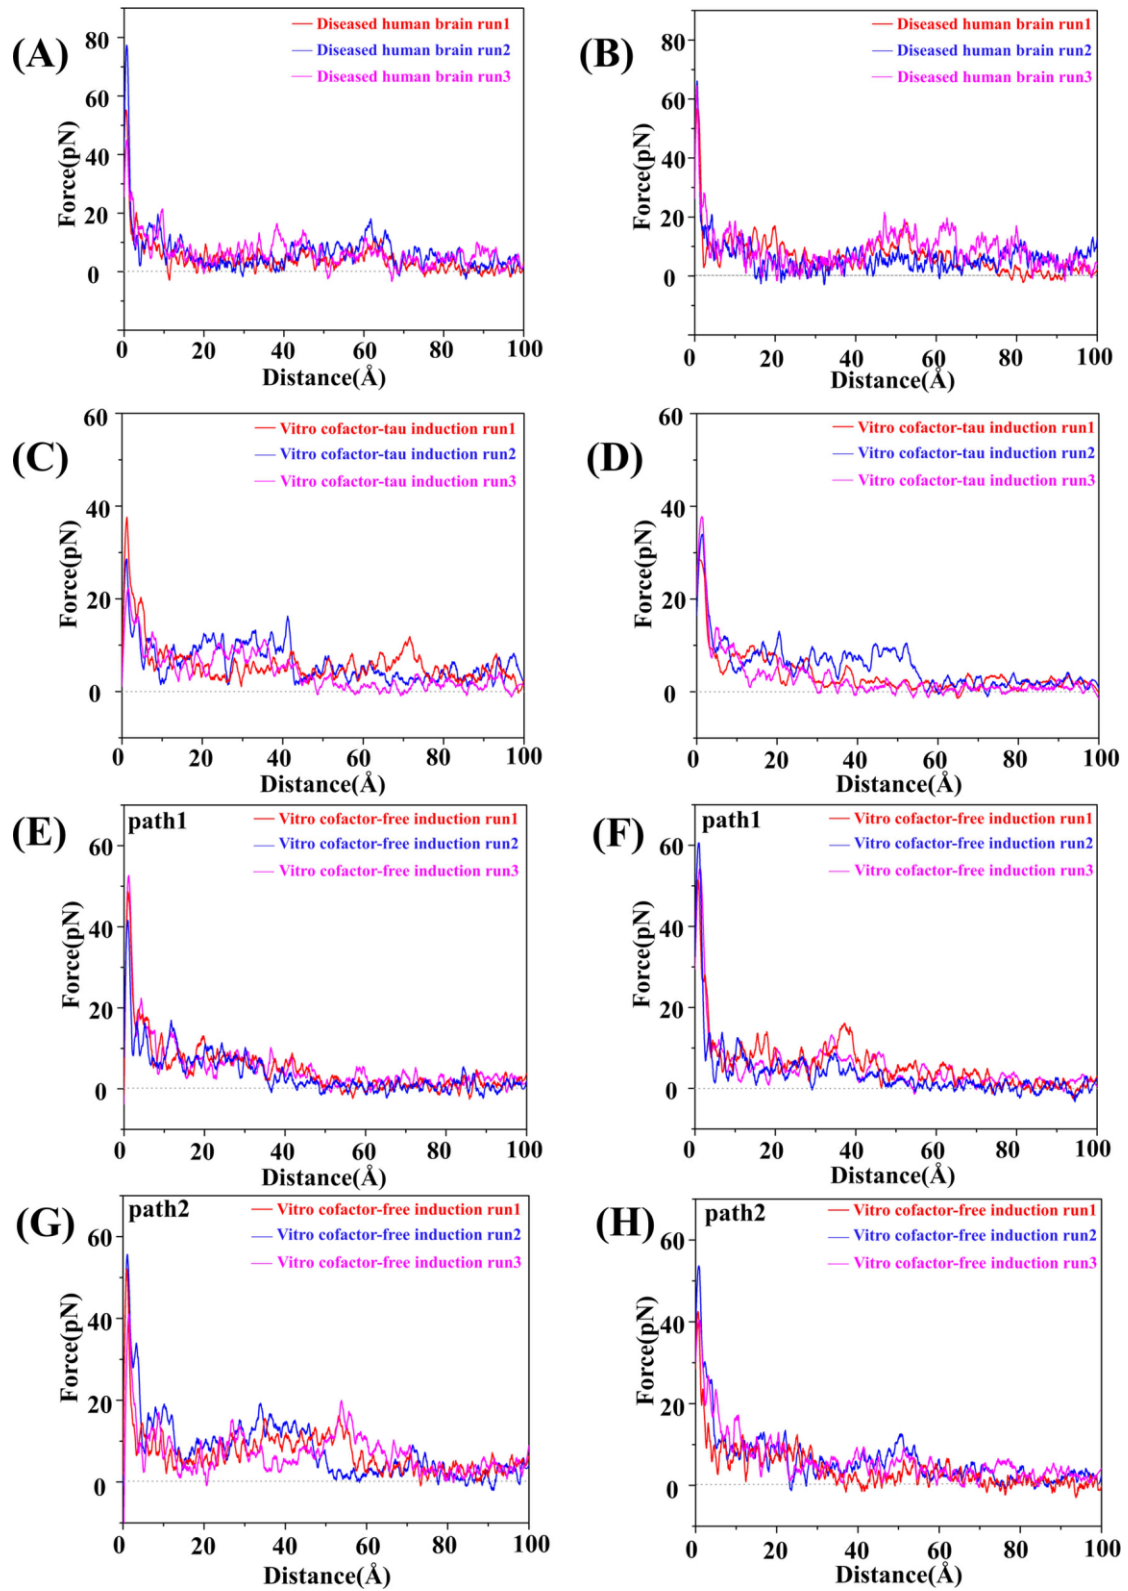

Figure S6. The changes of force over the reaction coordinate. (A,B) Chain-1 and Chain-5 of  $\alpha$ -Syn fibrils in diseased human brains. (C,D) Chain-1 and Chain-4 of  $\alpha$ -Syn fibrils in the cofactor-tau induction. (E,F) Chain-1 and Chain-5 of  $\alpha$ -Syn fibrils in the cofactor-free induction in the path1. (G,H) Chain-1 and Chain-5 of  $\alpha$ -Syn fibrils in the cofactor-free induction in the path2.

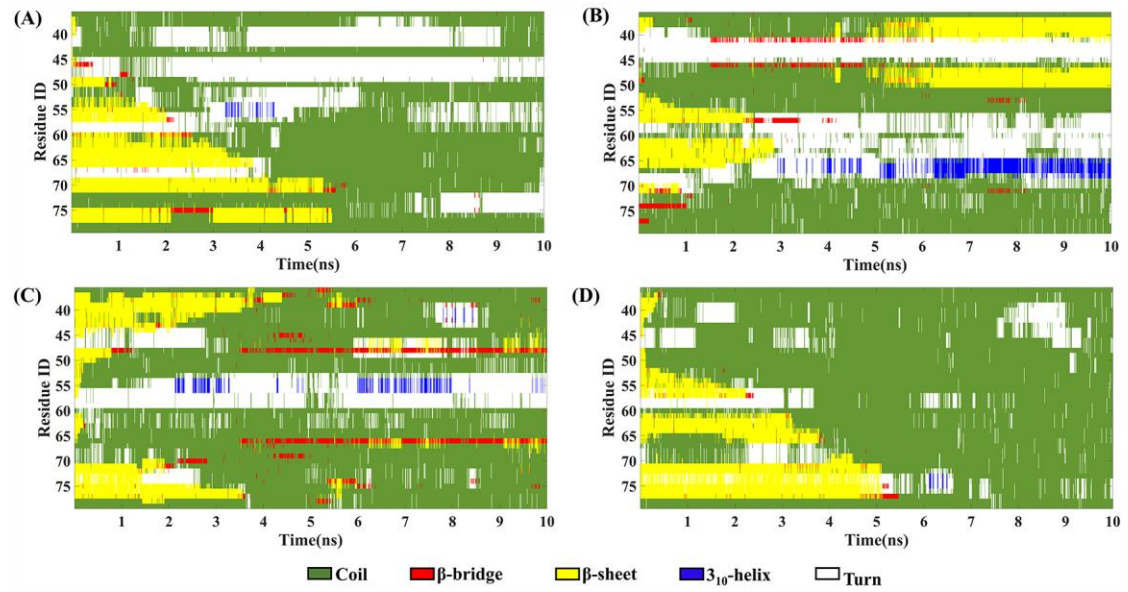

Figure S7. Changes in the secondary structure as a function of time. (A) Chain-5 of  $\alpha$ -Syn fibrils in diseased human brain systems. (B) Chain-4 of  $\alpha$ -Syn fibrils in the cofactor-tau induction. (C) Chain-5 of  $\alpha$ -Syn fibrils in the cofactor-free induction in the path1. (D) Chain-5 of  $\alpha$ -Syn fibrils in the cofactor-free induction in the path2.



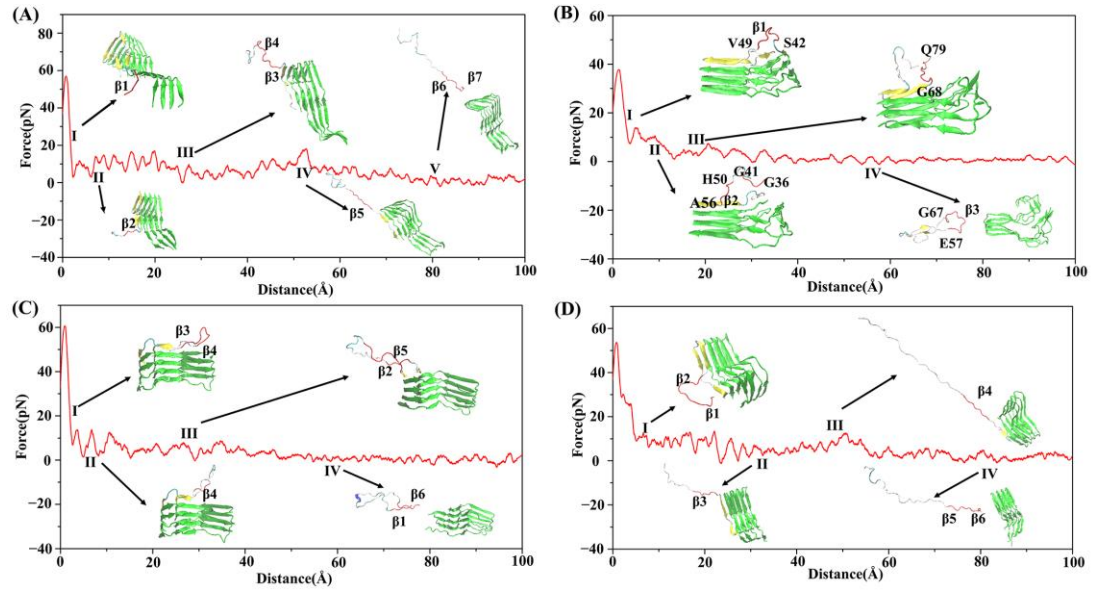

Figure S8. Changes of the force over the reaction coordinate. (A) Chain-5 of  $\alpha$ -Syn fibrils in diseased human brain systems. (B) Chain-4 of  $\alpha$ -Syn fibrils in the cofactor-tau induction. (C) Chain-5 of  $\alpha$ -Syn fibrils in the cofactor-free induction in the path1. (D) Chain-5 of  $\alpha$ -Syn fibrils in the cofactor-free induction in the path2. I–IV represents the five stages of dissociation. The arrow points to the representative conformation of each stage.

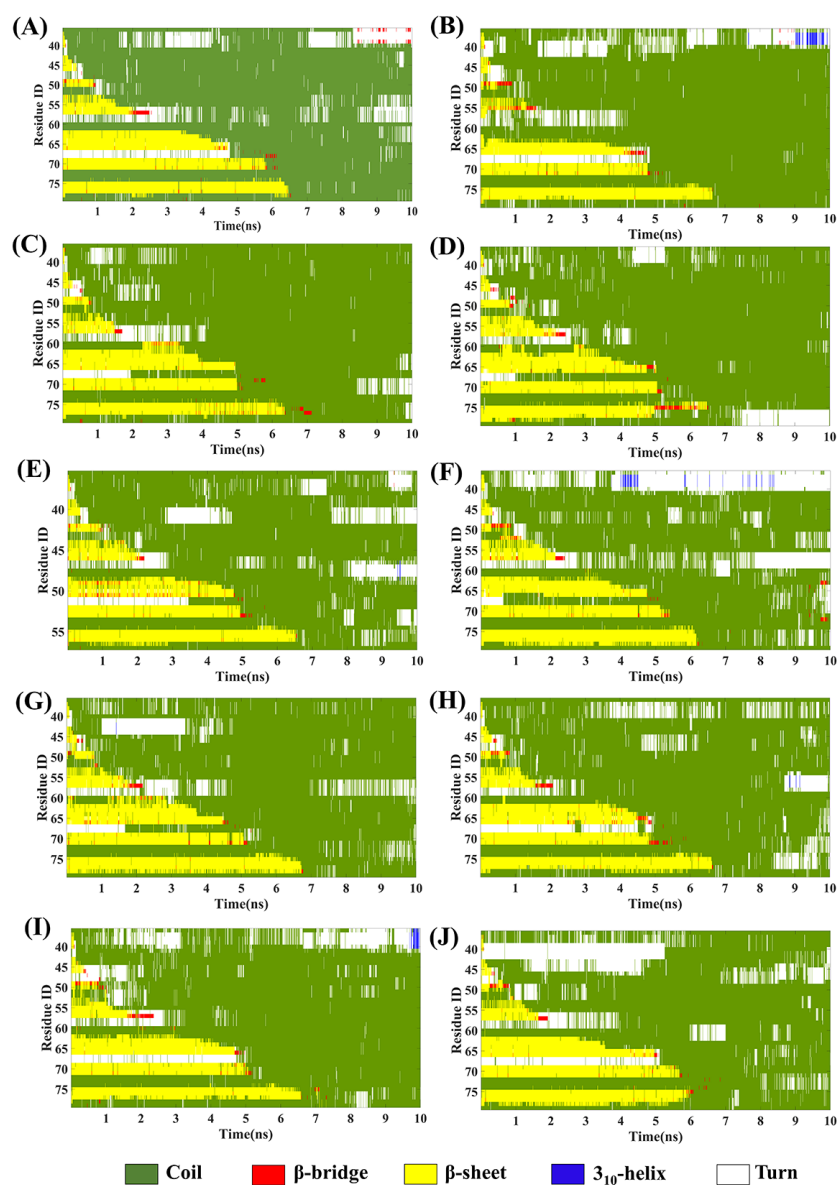

Figure S9. Changes in the secondary structure as a function of time. (A–J) represent run1–run10 on Chain 1 of  $\alpha$ -Syn fibrils in diseased human brains.

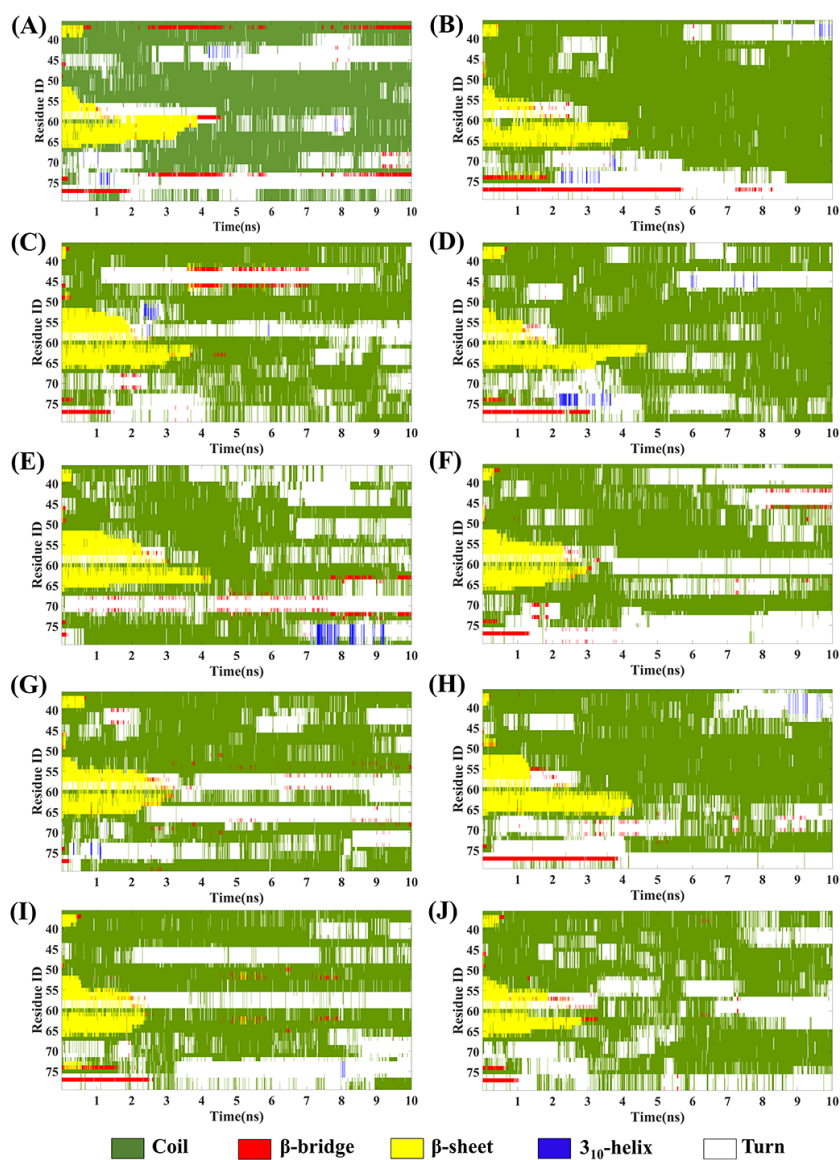

Figure S10. Changes in the secondary structure as a function of time. (A–J) represent run1-run10 on Chain 1 of  $\alpha$ -Syn fibrils in the cofactor-tau induction model.

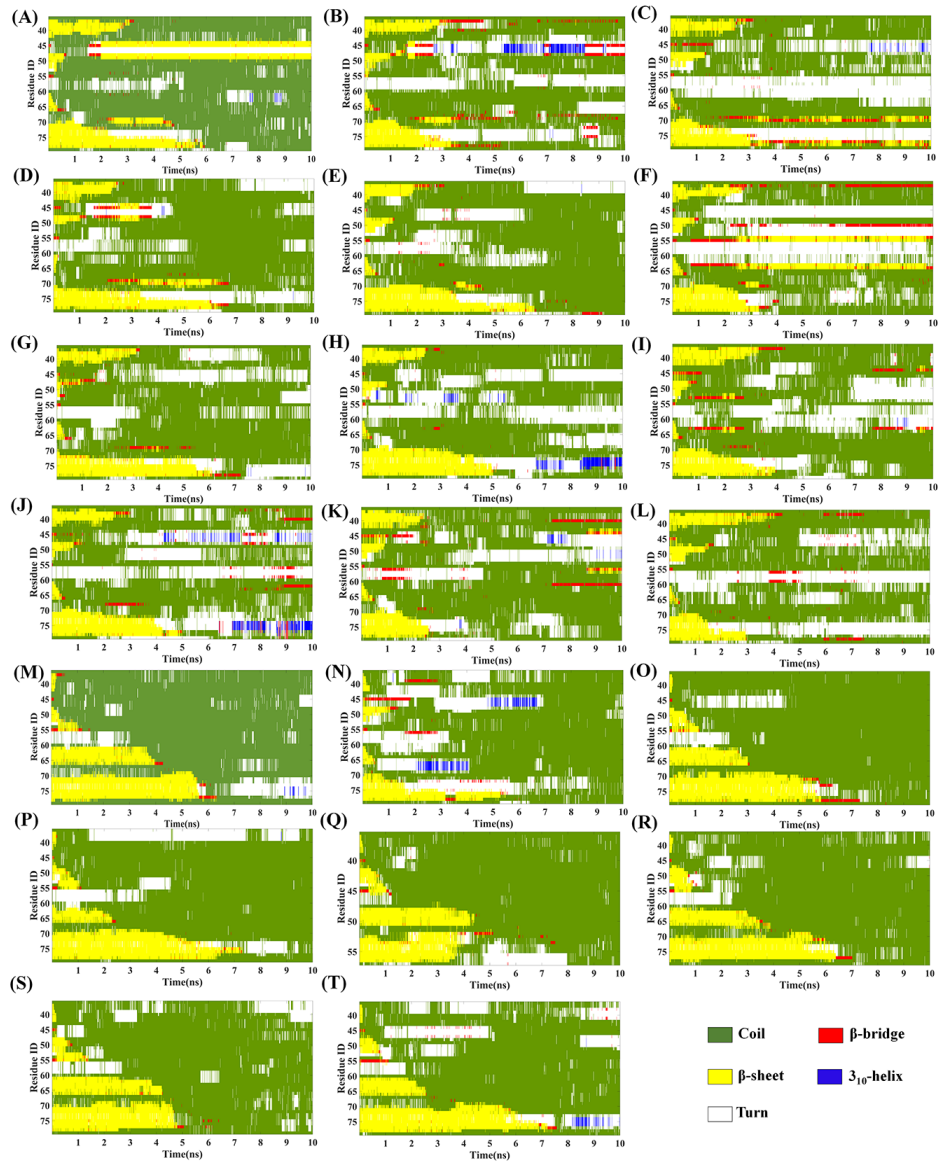

Figure S11. Changes in the secondary structure as a function of time. (A–L) represent run1-run12 on Chain 1 of  $\alpha$ -Syn fibrils in the cofactor-free induction in the path 1. (M–T) represent run1-run8 on Chain 1 of  $\alpha$ -Syn fibrils in the cofactor-free induction in the path 2.

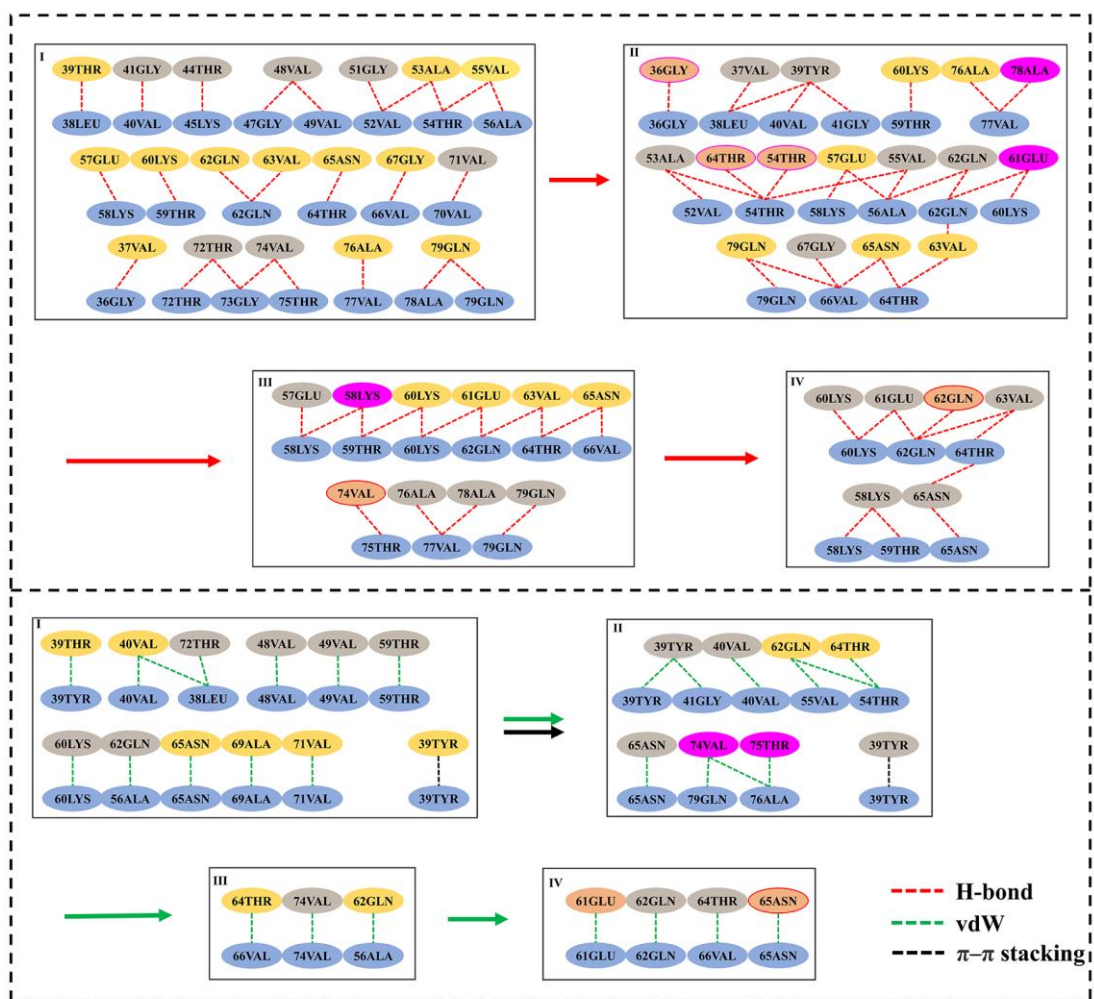

Figure S12. The residue interaction network analysis for cofactor-tau system.



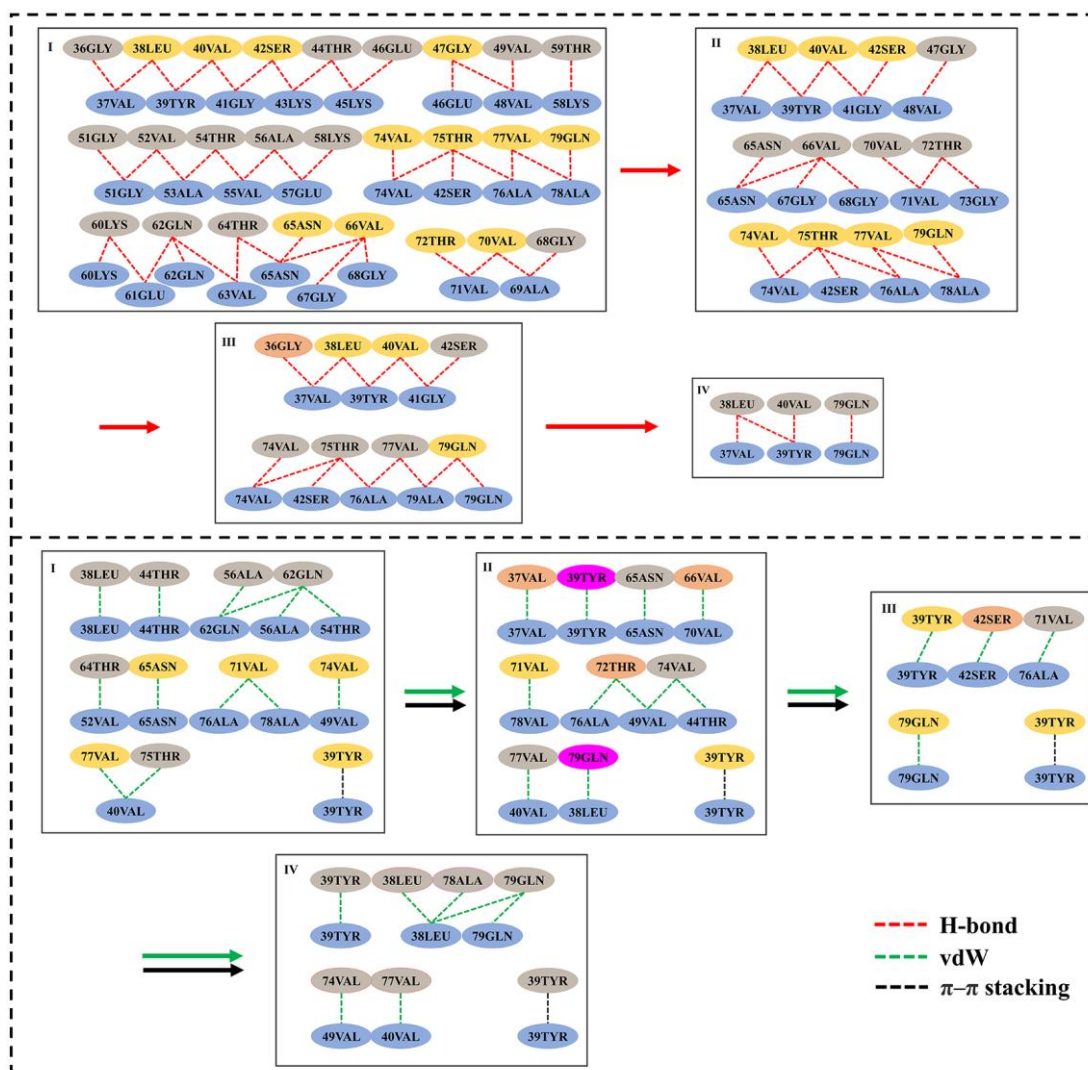

Figure S13. The residue interaction network analysis for cofactor-free system in path1.
